# Supplementary material
Source: HighWire-hosted journal article supplement (https://jnis.bmj.com/content/16/2/156)
Supplement: inline-supplementary-material-1 [file inline-supplementary-material-1.pdf]

**Table S1.** Additional staffing required for running 24/7/365 MT services at a Swedish hospital with 300 MT procedures per year.

| <b>Staffing</b>                                          | <b>Unit cost per year, median</b><br>[10 <sup>th</sup> – 90 <sup>th</sup> percentile] | <b>Units required</b><br>(Full Time Equivalents) | <b>Source</b>                |
|----------------------------------------------------------|---------------------------------------------------------------------------------------|--------------------------------------------------|------------------------------|
| Anaesthesiologist                                        | €138 617<br>[€109 568 - €175 506]                                                     | 1                                                | Swedish Medical Association. |
| Anaesthesiology nurse                                    | €68 234<br>[€57 901 - €81 848]                                                        | 2                                                | Statistics Sweden.           |
| Assisting AISI interventionalist<br>(stroke neurologist) | €125 971<br>[€103 335 - €157 791]                                                     | 3                                                | Swedish Medical Association. |
| Neurointerventionalist,<br>first operator                | €137 288<br>[€106 616 - €172 390]                                                     | 3                                                | Swedish Medical Association. |
| Nurse,<br>stroke coordinating                            | €67 490<br>[€54 456 - €63 641]                                                        | 3                                                | Statistics Sweden.           |
| Radiographer                                             | €58 393<br>[€47 895 - €72 171]                                                        | 3                                                | Statistics Sweden.           |
| In total                                                 | €1 434 409<br>[€1 162 277 - €1 737 181]                                               | 1                                                | NA                           |

**Table S2.** Modelling outcomes in extended scenario (7 CSCs and 1,...,14 TSCs compared with no C-/TSCs, MT rate: 0.07, max. WTP: EUR 80 000).

| Outcomes                                                                        | Additional TSCs |      |      |      |      |      |      |      |      |      |      |      |      |      |
|---------------------------------------------------------------------------------|-----------------|------|------|------|------|------|------|------|------|------|------|------|------|------|
|                                                                                 | 1               | 2    | 3    | 4    | 5    | 6    | 7    | 8    | 9    | 10   | 11   | 12   | 13   | 14   |
| n = 1 229                                                                       |                 |      |      |      |      |      |      |      |      |      |      |      |      |      |
| C-/TSC density per 1 million inhabitants*                                       | 0.77            | 0.86 | 0.96 | 1.05 | 1.15 | 1.24 | 1.34 | 1.44 | 1.53 | 1.63 | 1.72 | 1.82 | 1.91 | 2.01 |
| Patients with OTT <sub>MT</sub> ≤ 360 minutes (%)                               | 98.5            | 99.0 | 99.1 | 99.1 | 99.1 | 99.1 | 99.1 | 99.1 | 99.1 | 99.1 | 99.1 | 99.1 | 99.1 | 99.1 |
| CVT (%)                                                                         | 2.2             | 2.1  | 2.1  | 1.4  | 1.4  | 1.2  | 1.2  | 1.2  | 1.2  | 1.2  | 1.1  | 1.2  | 1.2  | 1.2  |
| IVT only (%)                                                                    | 2.7             | 1.6  | 1.4  | 1.1  | 1.1  | 0.7  | 0.7  | 0.7  | 0.7  | 0.7  | 0.6  | 0.5  | 0.5  | 0.2  |
| MT only (%)                                                                     | 47.7            | 47.8 | 47.8 | 48.6 | 48.6 | 48.7 | 48.8 | 48.8 | 48.8 | 48.8 | 48.9 | 48.9 | 48.9 | 48.9 |
| IVT+MT (%)                                                                      | 47.3            | 48.5 | 48.7 | 49.0 | 49.0 | 49.3 | 49.4 | 49.4 | 49.4 | 49.4 | 49.5 | 49.5 | 49.5 | 49.7 |
| Drip-and-Ship pathway (%)                                                       | 29.9            | 29.1 | 27.2 | 24.6 | 23.5 | 22.4 | 21.1 | 19.6 | 18.3 | 16.9 | 16.0 | 15.7 | 14.7 | 14.1 |
| QALYs gained, per year                                                          | 697             | 701  | 713  | 723  | 731  | 737  | 743  | 747  | 752  | 756  | 760  | 761  | 764  | 767  |
| Additional EMS transportation costs (m EUR) <sup>†</sup>                        | 7.3             | 6.9  | 6.0  | 4.6  | 4.2  | 3.8  | 3.4  | 3.2  | 2.8  | 2.6  | 2.3  | 2.2  | 2.1  | 1.9  |
| Additional CSC staffing costs (m EUR)**                                         | 8.6             | 10.0 | 11.4 | 12.8 | 14.2 | 15.6 | 17.1 | 18.5 | 20.0 | 21.4 | 22.8 | 24.3 | 25.7 | 27.1 |
| Additional drug medical equipment costs (m EUR)**                               | 3.0             | 3.0  | 3.0  | 3.0  | 3.0  | 3.1  | 3.1  | 3.1  | 3.1  | 3.1  | 3.1  | 3.1  | 3.1  | 3.1  |
| Additional 1 <sup>st</sup> and 2 <sup>nd</sup> year post-stroke costs (m EUR)** | -7.6            | -7.6 | -7.7 | -7.9 | -8.1 | -8.2 | -8.3 | -8.4 | -8.5 | -8.6 | -8.7 | -8.7 | -8.8 | -8.8 |
| Incremental cost, annual (m EUR)                                                | 11.2            | 12.2 | 12.7 | 12.6 | 13.5 | 14.3 | 15.3 | 16.4 | 17.3 | 18.4 | 19.5 | 20.8 | 22.1 | 23.3 |
| Incremental NMB per patient (thousand EUR)                                      | 36.2            | 35.7 | 36.1 | 36.9 | 36.6 | 36.3 | 35.9 | 35.3 | 34.8 | 34.3 | 33.6 | 32.6 | 31.8 | 30.9 |

\*for a population of 10 452 326 individuals (the Swedish population at the end of year 2021). \*\*per year. <sup>†</sup>of 1 708 triage positive cases per year.
