# Supplementary material
Source: HighWire-hosted journal article supplement (https://jnis.bmj.com/content/16/2/156)
Supplement: inline-supplementary-material-2 [file inline-supplementary-material-2.pdf]

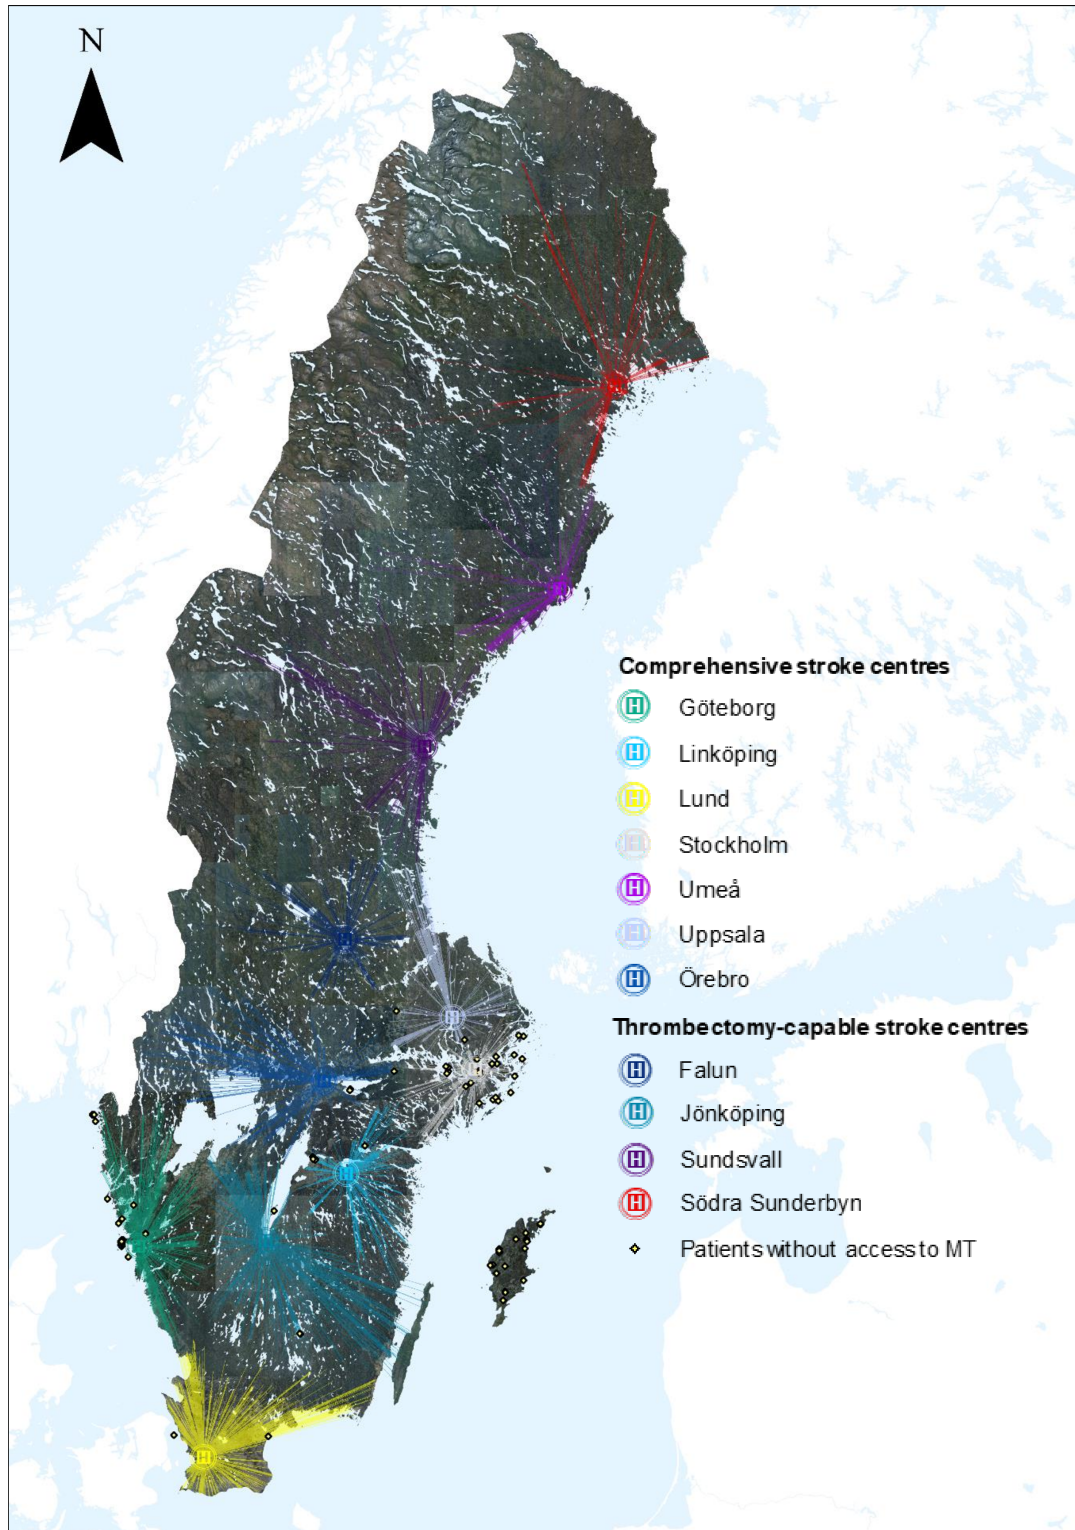

**Figure S2.** Visualised solution to location-allocation problem for seven CSCs and four TSCs. Web map service provided by Region Skåne Web Map Service, WMS server: <https://geodata.skane.se/geoserver/Im/wms?>, access date: Nov. 17<sup>th</sup>, 2021.
