# Supplementary material
Source: HighWire-hosted journal article supplement (https://jnis.bmj.com/content/16/2/156)
Supplement: inline-supplementary-material-3 [file inline-supplementary-material-3.pdf]

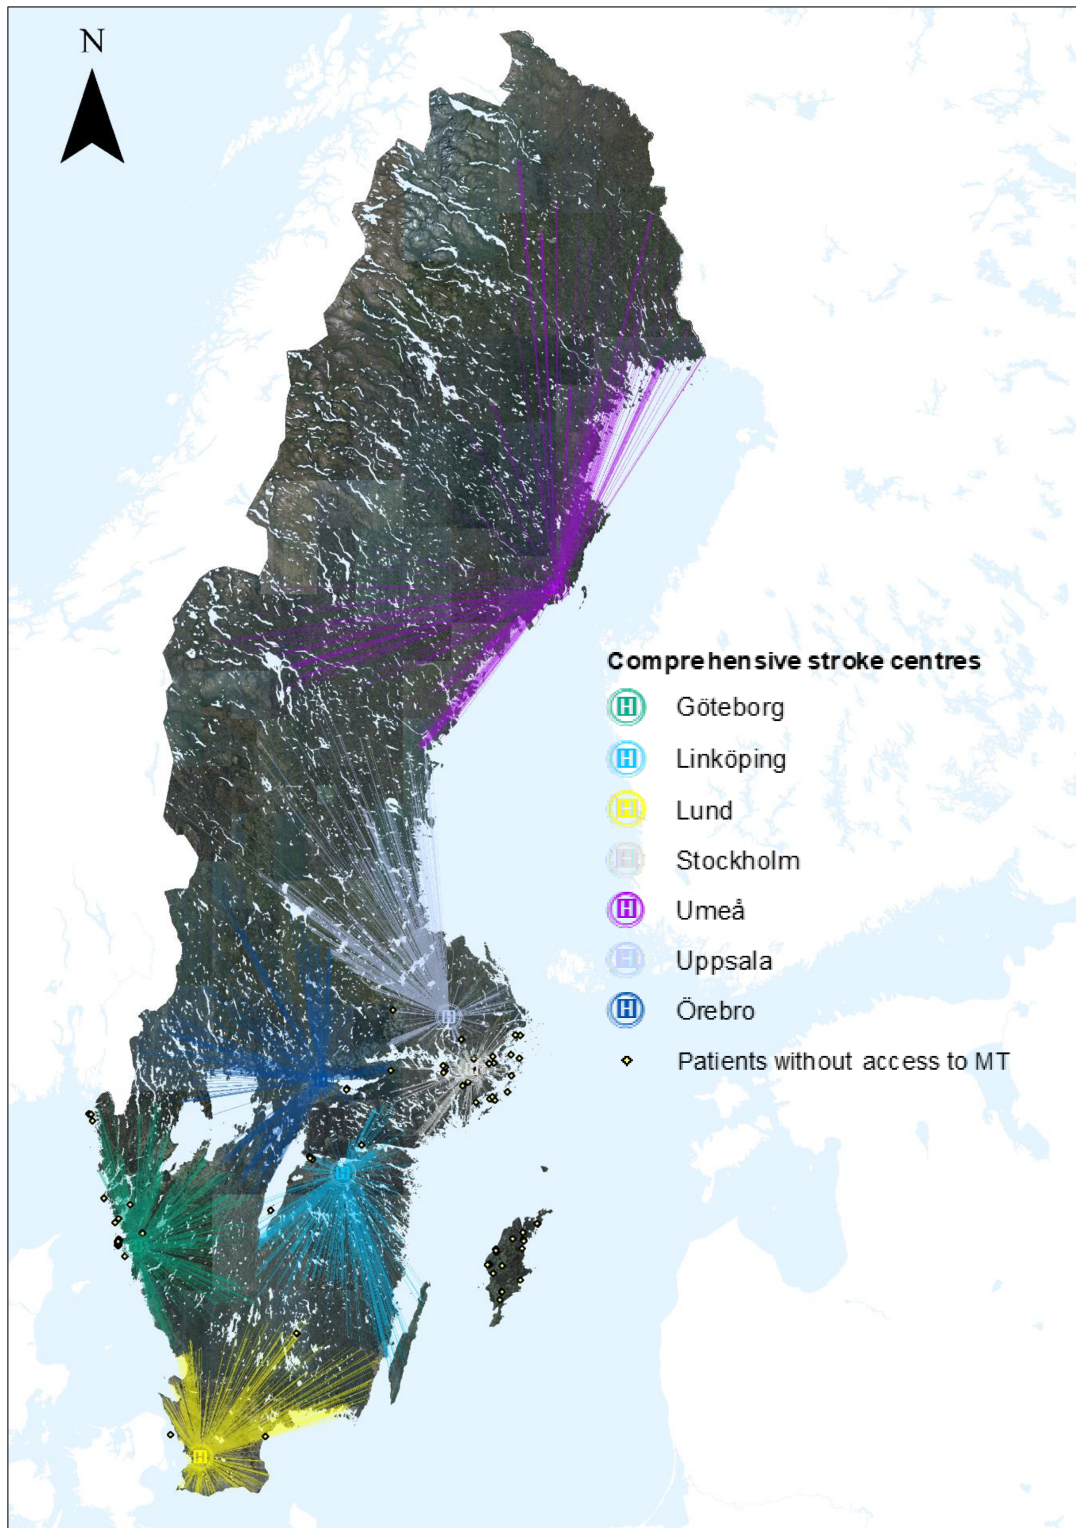

**Figure S1.** Visualised solution to location-allocation problem for seven CSCs. Web map service provided by Region Skåne Web Map Service, WMS server: <https://geodata.skane.se/geoserver/lm/wms?>, access date: Nov. 17<sup>th</sup>, 2021.
